# Supplementary material for: Efficacy and safety of canagliflozin compared with placebo and sitagliptin in patients with type 2 diabetes on background metformin monotherapy: a randomised trial
Source: PubMed Central journal article supplement — Diabetologia. 2013 Sep 13;56(12):2582–92. doi: 10.1007/s00125-013-3039-1 (PMC3825495; doi:10.1007/s00125-013-3039-1), 2013-09-13
Supplement: 125_2013_3039_MOESM1_ESM.pdf [file 125_2013_3039_MOESM1_ESM.pdf]

**ESM Table 1. Summary of Efficacy Findings at Week 26 (LOCF)**

| <b>Parameter</b>                        | <b>PBO<br/>(n = 183)</b>     | <b>SITA 100 mg<br/>(n = 366)</b>  | <b>CANA 100 mg<br/>(n = 368)</b>  | <b>CANA 300 mg<br/>(n = 367)</b>  |
|-----------------------------------------|------------------------------|-----------------------------------|-----------------------------------|-----------------------------------|
| HbA <sub>1c</sub> , n                   | 181                          | 354                               | 365                               | 360                               |
| Mean ± SD baseline, %<br>(mmol/mol)     | 8.0 ± 0.9 (64 ± 9.8)         | 7.9 ± 0.9 (63 ± 9.8)              | 7.9 ± 0.9 (63 ± 9.8)              | 8.0 ± 0.9 (64 ± 9.8)              |
| LS mean ± SE change, %<br>(mmol/mol)    | -0.17 ± 0.06<br>(-1.9 ± 0.7) | -0.82 ± 0.04<br>(-9.0 ± 0.4)      | -0.79 ± 0.04<br>(-8.6 ± 0.4)      | -0.94 ± 0.04<br>(-10.3 ± 0.4)     |
| Difference vs PBO (95% CI), %           |                              | -0.66 (-0.80, -0.52) <sup>a</sup> | -0.62 (-0.76, -0.48) <sup>b</sup> | -0.77 (-0.91, -0.64) <sup>b</sup> |
| Difference vs PBO (95% CI),<br>mmol/mol |                              | -7.2 (-8.7, -5.7) <sup>a</sup>    | -6.8 (-8.3, -5.2) <sup>b</sup>    | -8.4 (-9.9, -7.0) <sup>b</sup>    |
| FPG, n                                  | 181                          | 354                               | 365                               | 360                               |
| Mean ± SD baseline, mmol/l              | 9.1 ± 2.1                    | 9.4 ± 2.3                         | 9.4 ± 2.3                         | 9.6 ± 2.5                         |
| LS mean ± SE change                     | 0.1 ± 0.1                    | -1.1 ± 0.1                        | -1.5 ± 0.1                        | -2.1 ± 0.1                        |
| Difference vs PBO (95% CI)              |                              | -1.3 (-1.6, -0.9) <sup>a</sup>    | -1.7 (-2.0, -1.3) <sup>b</sup>    | -2.2 (-2.6, -1.9) <sup>b</sup>    |
| 2-hour PPG, n                           | 129                          | 295                               | 298                               | 288                               |

|                             |              |                                |                                |                                |
|-----------------------------|--------------|--------------------------------|--------------------------------|--------------------------------|
| Mean ± SD baseline, %       | 13.8 ± 3.6   | 14.2 ± 3.6                     | 14.3 ± 3.8                     | 14.5 ± 4.1                     |
| LS mean ± SE change         | -0.6 ± 0.3   | -2.7 ± 0.2                     | -2.7 ± 0.2                     | -3.2 ± 0.2                     |
| Difference vs PBO (95% CI)  |              | -2.2 (-2.8, -1.6) <sup>a</sup> | -2.1 (-2.7, -1.5) <sup>b</sup> | -2.6 (-3.2, -2.0) <sup>b</sup> |
| Body weight, n              | 181          | 355                            | 365                            | 360                            |
| Mean ± SD baseline, kg      | 86.7 ± 22.5  | 87.6 ± 20.9                    | 88.7 ± 22.3                    | 85.4 ± 20.7                    |
| LS mean ± SE change, kg     | -1.1 ± 0.2   | -1.1 ± 0.2                     | -3.3 ± 0.2                     | -3.6 ± 0.2                     |
| LS mean ± SE percent change | -1.2 ± 0.3   | -1.2 ± 0.2                     | -3.7 ± 0.2                     | -4.2 ± 0.2                     |
| Difference vs PBO (95% CI)  |              | 0.0 (-0.6, 0.6) <sup>a</sup>   | -2.5 (-3.1, -1.9) <sup>b</sup> | -2.9 (-3.5, -2.3) <sup>b</sup> |
| Systolic BP, n              | 181          | 355                            | 365                            | 360                            |
| Mean ± SD baseline, mm Hg   | 128.0 ± 12.7 | 128.0 ± 13.5                   | 128.0 ± 12.7                   | 128.7 ± 13.0                   |
| LS mean ± SE change         | 1.5 ± 0.8    | -1.8 ± 0.6                     | -3.8 ± 0.6                     | -5.1 ± 0.6                     |
| Difference vs PBO (95% CI)  |              | -3.3 (-5.3, -1.4) <sup>a</sup> | -5.4 (-7.3, -3.4) <sup>b</sup> | -6.6 (-8.5, -4.7) <sup>b</sup> |
| Diastolic BP, n             | 181          | 355                            | 365                            | 360                            |
| Mean ± SD baseline, mm Hg   | 77.8 ± 8.0   | 77.5 ± 8.0                     | 77.7 ± 8.4                     | 77.9 ± 8.3                     |
| LS mean change ± SE         | 0.3 ± 0.5    | -1.1 ± 0.4                     | -2.2 ± 0.4                     | -2.1 ± 0.4                     |
| Difference vs PBO (95% CI)  |              | -1.4 (-2.6, -0.1) <sup>a</sup> | -2.5 (-3.7, -1.2) <sup>a</sup> | -2.4 (-3.6, -1.1) <sup>a</sup> |

|                             |                    |                                |                               |                                |
|-----------------------------|--------------------|--------------------------------|-------------------------------|--------------------------------|
| Triacylglycerol, n          | 171                | 338                            | 358                           | 341                            |
| Mean ± SD baseline, mmol/l  | 2.1 ± 1.3          | 2.0 ± 1.1                      | 2.2 ± 1.6                     | 2.1 ± 1.5                      |
| LS mean ± SE change         | -0.03 ± 0.08       | -0.08 ± 0.06                   | -0.10 ± 0.06                  | -0.27 ± 0.06                   |
| Median (IQR) percent change | -6.2 (-24.6, 22.4) | -3.7 (-24.4, 19.4)             | -4.7 (-24.7, 21.4)            | -13.5 (-30.6, 15.6)            |
| LS mean ± SE percent change | 3.2 ± 3.6          | 1.0 ± 2.7                      | 1.6 ± 2.6                     | -1.4 ± 2.6                     |
| Difference vs PBO (95% CI)  |                    | -2.3 (-10.6, 6.1) <sup>a</sup> | -1.6 (-9.9, 6.7) <sup>c</sup> | -4.6 (-13.0, 3.7) <sup>c</sup> |
| LDL-C, n                    | 170                | 335                            | 354                           | 335                            |
| Mean ± SD baseline, mmol/l  | 2.7 ± 0.9          | 2.8 ± 0.9                      | 2.8 ± 0.8                     | 2.8 ± 0.9                      |
| LS mean ± SE change         | -0.11 ± 0.05       | 0.02 ± 0.04                    | 0.08 ± 0.04                   | 0.18 ± 0.04                    |
| Median (IQR) percent change | -3.4 (-16.8, 10.1) | -1.2 (-11.4, 11.6)             | 1.9 (-10.2, 19.4)             | 8.3 (-8.8, 22.8)               |
| LS mean ± SE percent change | -1.5 ± 2.4         | 4.1 ± 1.8                      | 6.5 ± 1.7                     | 10.7 ± 1.8                     |
| Difference vs PBO (95% CI)  |                    | 5.5 (-0.1, 11.2) <sup>a</sup>  | 7.9 (2.4, 13.5) <sup>a</sup>  | 12.2 (6.6, 17.8) <sup>a</sup>  |
| HDL-C, n                    | 171                | 336                            | 357                           | 336                            |
| Mean ± SD baseline, mmol/l  | 1.1 ± 0.3          | 1.2 ± 0.3                      | 1.2 ± 0.3                     | 1.2 ± 0.3                      |
| LS ± SE mean change         | 0.04 ± 0.02        | 0.05 ± 0.01                    | 0.11 ± 0.01                   | 0.13 ± 0.01                    |
| Median (IQR) percent change | 2.7 (-5.9, 14.4)   | 4.4 (-5.7, 14.0)               | 8.6 (-0.8, 19.3)              | 11.2 (0.0, 21.4)               |

|                             |                    |                              |                              |                              |
|-----------------------------|--------------------|------------------------------|------------------------------|------------------------------|
| LS mean ± SE percent change | 3.7 ± 1.3          | 5.0 ± 1.0                    | 10.3 ± 0.9                   | 12.1 ± 1.0                   |
| Difference vs PBO (95% CI)  |                    | 1.3 (−1.8, 4.3) <sup>a</sup> | 6.6 (3.6, 9.7) <sup>b</sup>  | 8.4 (5.3, 11.5) <sup>b</sup> |
| LDL-C/HDL-C, n              | 170                | 335                          | 354                          | 335                          |
| Mean ± SD baseline, mol/mol | 2.5 ± 1.0          | 2.6 ± 1.0                    | 2.5 ± 0.9                    | 2.4 ± 0.9                    |
| LS mean ± SE change         | −0.16 ± 0.05       | −0.08 ± 0.04                 | −0.13 ± 0.04                 | −0.09 ± 0.04                 |
| Median (IQR) percent change | −8.1 (−17.7, 6.3)  | −3.5 (−16.7, 11.0)           | −5.5 (−19.0, 10.5)           | −2.6 (−18.0, 12.9)           |
| LS mean ± SE percent change | −2.5 ± 2.3         | 0.5 ± 1.7                    | −1.3 ± 1.6                   | 0.7 ± 1.7                    |
| Difference vs PBO (95% CI)  |                    | 3.0 (−2.3, 8.4) <sup>a</sup> | 1.2 (−4.1, 6.5) <sup>a</sup> | 3.2 (−2.1, 8.6) <sup>a</sup> |
| Non-HDL-C, n                | 171                | 334                          | 355                          | 333                          |
| Mean ± SD baseline, mmol/l  | 3.7 ± 1.0          | 3.7 ± 1.0                    | 3.8 ± 1.1                    | 3.7 ± 1.0                    |
| LS mean ± SE change         | −0.10 ± 0.06       | −0.02 ± 0.04                 | 0.02 ± 0.04                  | 0.08 ± 0.04                  |
| Median (IQR) percent change | −2.8 (−13.6, 10.4) | −1.2 (−10.2, 9.5)            | −0.7 (−9.6, 14.3)            | 3.6 (−9.3, 15.4)             |
| LS mean ± SE percent change | −0.8 ± 1.8         | 1.6 ± 1.3                    | 2.8 ± 1.3                    | 4.5 ± 1.3                    |
| Difference vs PBO (95% CI)  |                    | 2.5 (−1.7, 6.6) <sup>a</sup> | 3.6 (−0.4, 7.7) <sup>a</sup> | 5.4 (1.2, 9.5) <sup>a</sup>  |

---

LOCF, last observation carried forward; PBO, placebo; SITA, sitagliptin; CANA, canagliflozin; SD, standard deviation; LS, least squares; SE, standard error; CI, confidence interval; FPG, fasting plasma glucose; PPG, postprandial glucose; BP, blood pressure,

IQR, interquartile range; LDL-C, low-density lipoprotein cholesterol; HDL-C, high-density lipoprotein cholesterol; NS, not significant.

<sup>a</sup>Statistical comparison vs PBO not performed (not pre-specified).

<sup>b</sup> $P < 0.001$  vs PBO.

<sup>c</sup> $P = \text{NS}$  vs PBO.
