# Supplementary material for: Efficacy and safety of canagliflozin compared with placebo and sitagliptin in patients with type 2 diabetes on background metformin monotherapy: a randomised trial
Source: PubMed Central journal article supplement — Diabetologia. 2013 Sep 13;56(12):2582–92. doi: 10.1007/s00125-013-3039-1 (PMC3825495; doi:10.1007/s00125-013-3039-1), 2013-09-13
Supplement: 125_2013_3039_MOESM2_ESM.pdf [file 125_2013_3039_MOESM2_ESM.pdf]

**ESM Table 2. Summary of Overall Safety and Selected Adverse Events During 26-Week Double-Blind Extension Period  
(Weeks 26-52; Period II)<sup>a</sup>**

|                                        | <b>PBO/SITA</b>  | <b>SITA 100 mg</b> | <b>CANA 100 mg</b> | <b>CANA 300 mg</b> |
|----------------------------------------|------------------|--------------------|--------------------|--------------------|
| <b>Participants, n (%)</b>             | <b>(n = 153)</b> | <b>(n = 313)</b>   | <b>(n = 316)</b>   | <b>(n = 321)</b>   |
| Any AE                                 | 63 (41.2)        | 134 (42.8)         | 138 (43.7)         | 119 (37.1)         |
| AEs leading to discontinuation         | 1 (0.7)          | 8 (2.6)            | 0                  | 1 (0.3)            |
| AEs related to study drug <sup>b</sup> | 7 (4.6)          | 28 (8.9)           | 29 (9.2)           | 16 (5.0)           |
| Serious AEs                            | 3 (2.0)          | 10 (3.2)           | 3 (0.9)            | 4 (1.2)            |
| Deaths                                 | 0                | 1 (0.3)            | 0                  | 0                  |
| Selected AEs                           |                  |                    |                    |                    |
| UTI                                    | 10 (6.5)         | 12 (3.8)           | 12 (3.8)           | 6 (1.9)            |
| Genital mycotic infection              |                  |                    |                    |                    |
| Male <sup>c,d</sup>                    | 0                | 0                  | 3 (2.0)            | 1 (0.7)            |
| Female <sup>e,f</sup>                  | 1 (1.4)          | 2 (1.2)            | 8 (4.8)            | 1 (0.6)            |
| Osmotic diuresis-related AEs           |                  |                    |                    |                    |
| Pollakiuria <sup>g</sup>               | 0                | 0                  | 0                  | 2 (0.6)            |

|                         |   |   |         |         |
|-------------------------|---|---|---------|---------|
| Polyuria <sup>h</sup>   | 0 | 0 | 0       | 0       |
| Volume-related AEs      |   |   |         |         |
| Postural dizziness      | 0 | 0 | 1 (0.3) | 2 (0.6) |
| Orthostatic hypotension | 0 | 0 | 0       | 0       |

---

PBO, placebo; SITA, sitagliptin; CANA, canagliflozin; AE, adverse event; UTI, urinary tract infection.

<sup>a</sup>All AEs are reported for regardless of rescue medication.

<sup>b</sup>Possibly, probably, or very likely related to study drug, as assessed by investigators.

<sup>c</sup>PBO/SITA, n = 81; SITA 100 mg, n = 148; CANA 100 mg, n = 148; CANA 300 mg, n = 142.

<sup>d</sup>Including balanitis and balanoposthitis.

<sup>e</sup>PBO/SITA, n = 72; SITA 100 mg, n = 165; CANA 100 mg, n = 168; CANA 300 mg, n = 179.

<sup>f</sup>Including vulvitis, vulvovaginal candidiasis, vulvovaginal mycotic infection, and vulvovaginitis.

<sup>g</sup>Increased urine frequency.

<sup>h</sup>Increased urine volume.
